# Supplementary material
Source: PubMed Central journal article supplement (PMC1622790)

**Des-TCR x**

**2.4KerIV-K<sup>b</sup>.Rag-2<sup>-/-</sup> (Tx)**

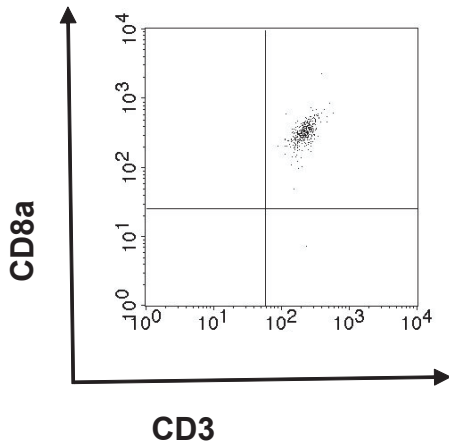

**Des-TCR.Rag-2<sup>-/-</sup> (Tx)**

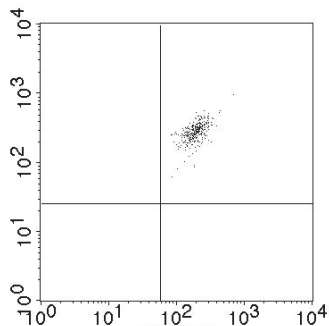

**Des-TCR x**

**2.4KerIV-K<sup>b</sup>.Rag-2<sup>-/-</sup> (Tx)**

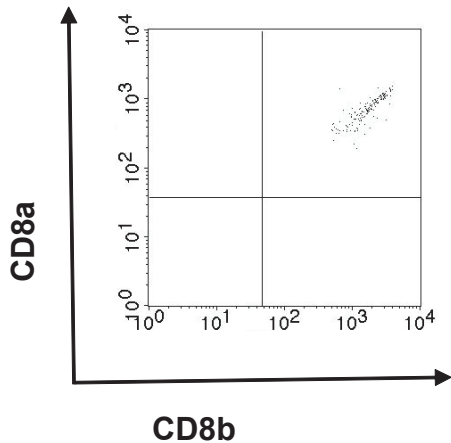

**Des-TCR.Rag-2<sup>-/-</sup> (Tx)**

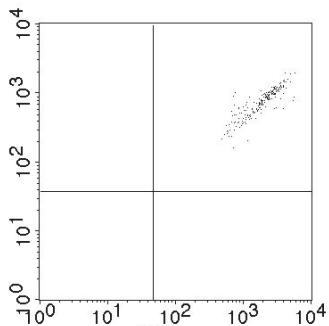

Supplement: pnas_0602622103_1.pdf [file pnas_0602622103_1.pdf]
